# Supplementary material for: Surface functionalization, particle size and pharmaceutical co-contaminant dependent impact of nanoplastics on marine crustacean – Artemia salina
Source: Royal Society of Chemistry journal article supplement (doi:10.1039/d4em00010b), 2024-01-01
Supplement: d4em00010b1.pdf [file d4em00010b1.pdf]

## Supplementary file

**Table S1: Isotherm Equations.**

| Isotherm   | Equation                                                                           | Parameters                                                                                                                                                                                                                                                  |
|------------|------------------------------------------------------------------------------------|-------------------------------------------------------------------------------------------------------------------------------------------------------------------------------------------------------------------------------------------------------------|
| Langmuir   | $\frac{C_e}{Q_e} = \left(\frac{1}{Q_m}\right)C_e + \left(\frac{1}{K_L Q_m}\right)$ | $Q_m$ = maximum adsorption capacity (mg/g)<br>$K_L$ = Langmuir constant (L/mg).                                                                                                                                                                             |
| Freundlich | $\log Q_e = \log K_f + \frac{1}{n} \log C_e$                                       | $K_f$ is the Freundlich constant (represents performance)<br>$1/n$ is the heterogeneity factor (represents effectiveness).                                                                                                                                  |
| Temkin     | $Q_e = B \ln K_T + B \ln C_e$                                                      | $B = RT/b$ , $T$ = temperature (K),<br>$R$ = Gas constant ( $8.314 \text{ JK}^{-1} \text{ mol}^{-1}$ ),<br>$b$ = Temkin constant related to the heat of adsorption ( $\text{J mol}^{-1}$ ), and $K_T$ = Equilibrium binding constant ( $\text{L mg}^{-1}$ ) |

**Table S2: Physiochemical Characteristics of Seawater**

| S.No. | Physiochemical Characteristics | Quantity (Units) |
|-------|--------------------------------|------------------|
| 1.    | Temperature                    | 27±0.3°C         |
| 2.    | pH                             | 8.1±0.07         |
| 3.    | Salinity                       | 35±0.1 ppt       |
| 4.    | Dissolved Oxygen               | 7.17 ±0.3 mg/L   |
| 5.    | Conductivity                   | 14.65±0.54 mS/cm |
| 6.    | Total Hardness                 | 100±2.3 mg/L     |
| 7.    | Calcium                        | 400±1.2 mg/L     |
| 8.    | Magnesium                      | 1300±15.2 mg/L   |
| 9.    | Potassium                      | 380±0.8 mg/L     |
| 10.   | Sulphate                       | 3708±23.5 mg/L   |

**Table S3: Zeta potential values of various PSNPs dispersed in Milli-Q and seawater**

| Particles          | Zeta potential (mV) |             |
|--------------------|---------------------|-------------|
|                    | In Milli-Q water    | In Seawater |
| MH                 | 0.1±0.09            | -0.98±0.04  |
| PS-100 nm          | -47.3±1.2           | -58.2±1.5   |
| PS-COOH            | -64.5±1.0           | -75.6±0.8   |
| PS-NH <sub>2</sub> | -53.1±0.5           | -66.3±1.4   |
| PS-500 nm          | -47.3±0.9           | -55.5±0.6   |

**Table S4: Hydrodynamic sizes of various PSNPs and PS-MH complexes dispersed in Milli-Q and seawater**

| Particles               | Hydrodynamic Size (nm) |           |
|-------------------------|------------------------|-----------|
|                         | Milli-Q water          | Sea water |
| PS-100 nm               | 100±4                  | 409±2     |
| PS-100 nm + MH          | 114±2                  | 570±5     |
| PS-COOH                 | 102±5                  | 430±6     |
| PS-COOH + MH            | 120±5                  | 620±3     |
| PS-NH <sub>2</sub>      | 100±7                  | 415±7     |
| PS-NH <sub>2</sub> + MH | 115±3                  | 585±6     |
| PS-500 nm               | 501±9                  | 895±2     |
| PS-500 nm + MH          | 560±8                  | 954±3     |

**Table. S5 Independent action model for the PSNPs+MH complex**

| <b>S.NO</b> | <b>Test samples</b>    | <b>Concentration of Complex pollutants (<math>\mu\text{g/ml}</math>)</b> | <b>RI value</b> | <b>Mode of action</b> |
|-------------|------------------------|--------------------------------------------------------------------------|-----------------|-----------------------|
| 1.          |                        | 2.5                                                                      | 1.10            | Synergistic           |
| 2.          | PS-100 + MH            | 5                                                                        | 1.14            | Synergistic           |
| 3.          |                        | 10                                                                       | 1.20            | Synergistic           |
| 4.          |                        | 2.5                                                                      | 1.06            | Synergistic           |
| 5.          | PS-COOH+MH             | 5                                                                        | 1.14            | Synergistic           |
| 6.          |                        | 10                                                                       | 1.20            | Synergistic           |
| 7.          |                        | 2.5                                                                      | 1.06            | Synergistic           |
| 8.          | PS-NH <sub>2</sub> +MH | 5                                                                        | 1.12            | Synergistic           |
| 9.          |                        | 10                                                                       | 1.17            | Synergistic           |
| 10.         |                        | 2.5                                                                      | 1.00            | Additive              |
| 11.         | PS-500 +MH             | 5                                                                        | 1.68            | Synergistic           |
| 12.         |                        | 10                                                                       | 1.69            | Synergistic           |

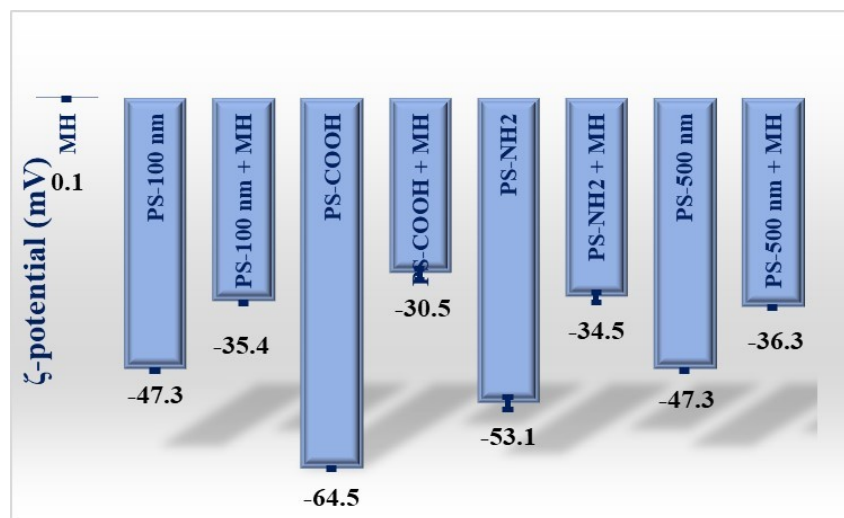

**Fig. S1.** Zeta potential of NPs, MH, and their corresponding complexes. [NPs], [MH], [NPs, MH – 1:0.5] = 10mg/L, pH=7. Data were the mean of triplicate experiments with SD.

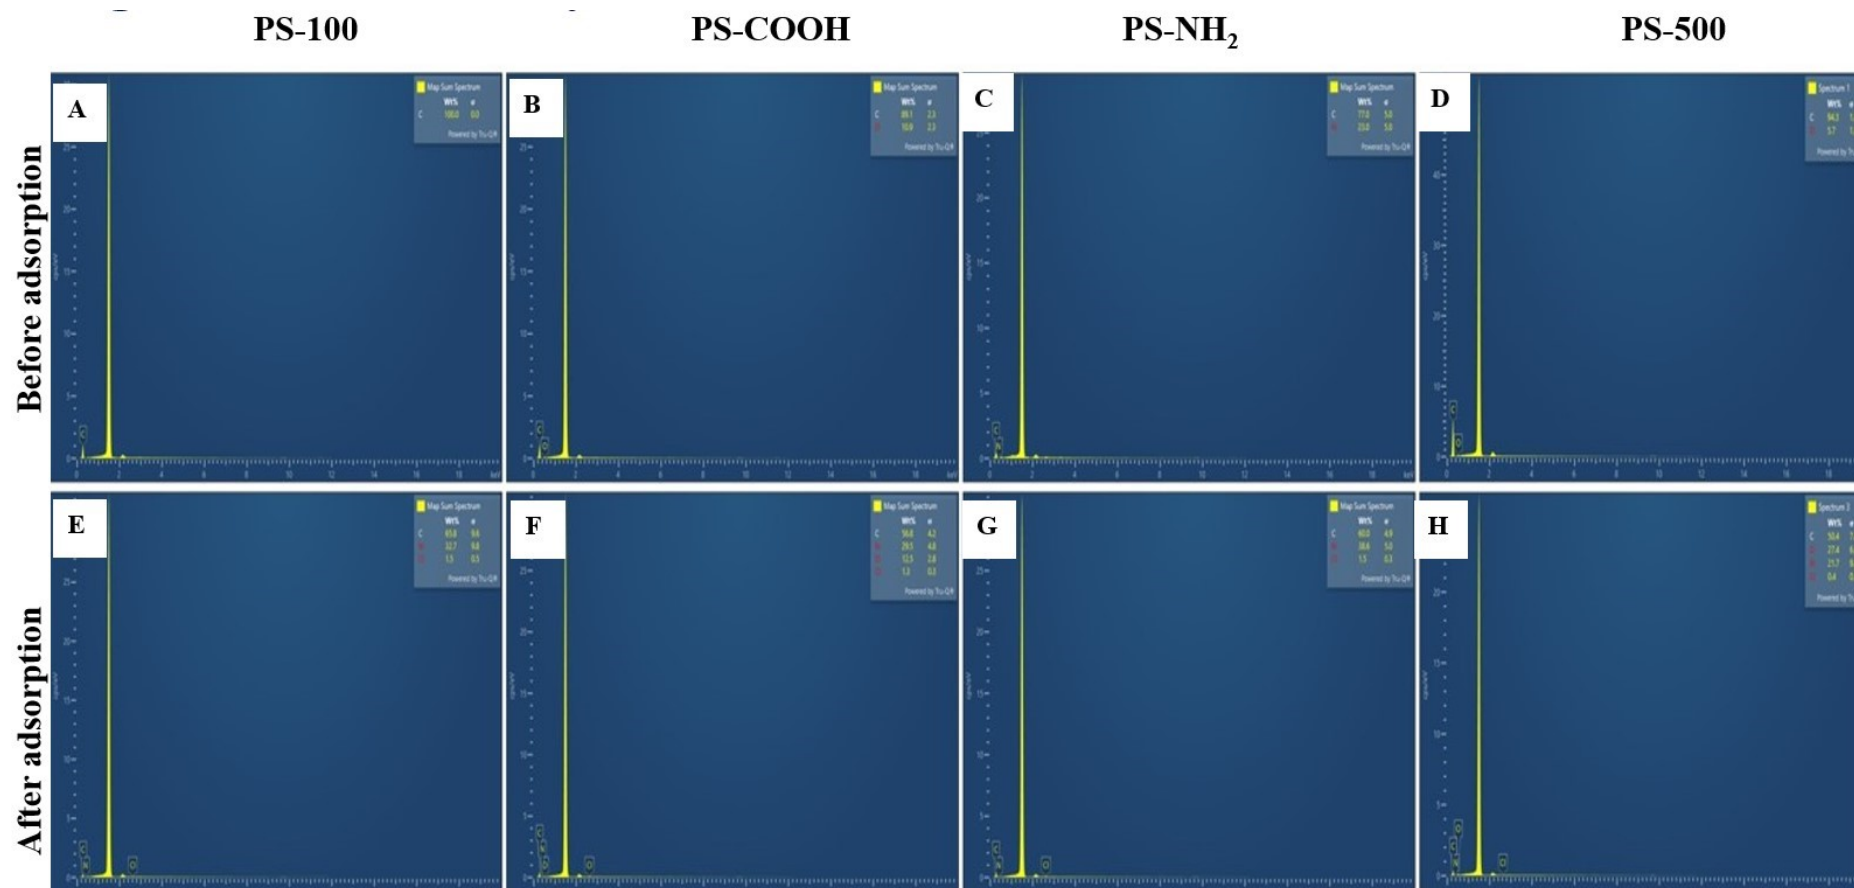

**Fig. S2.** A-D: EDX analysis of NPs before the adsorption process. (A) PS-100, (B) PS-COOH, (C) PS-NH<sub>2</sub>, (D) PS-500. E-H: EDX analysis of NPs after adsorption of MH. (E) PS-100+MH, (F) PS-COOH+MH, (G) PS-NH<sub>2</sub>+MH, (H) PS-500+MH.

| Decapsulation | Instar 1 | Instar 2 | Instar 3 | Observation                                                                                                                                                                                                                                                    |
|---------------|----------|----------|----------|----------------------------------------------------------------------------------------------------------------------------------------------------------------------------------------------------------------------------------------------------------------|
|               |          |          |          | <b>PS-100nm</b><br>Greater intake of PS compared to PS-200, 500 and PS-COOH, with slight difference in the body structure.                                                                                                                                     |
|               |          |          |          | <b>PS-COOH-100 nm</b><br>Intake of PS-COOH is also visible, however it is least significant than PS and PS-NH <sub>2</sub> .                                                                                                                                   |
|               |          |          |          | <b>PS-NH<sub>2</sub>-100 nm</b><br>Intake of particles is observed greater with developmental abnormality in the Instar 1 and 2 stages.                                                                                                                        |
|               |          |          |          | <b>PS-500 nm</b><br>Morphology was not affected but the accumulation of the particles is found in the gut region.                                                                                                                                              |
|               |          |          |          | <b>PS-200 nm (FI)</b><br>The fluorescent particles are seen attached to the cyst and up taken by larvae.                                                                                                                                                       |
|               |          |          |          | <b>PS-100+MH</b><br>When adsorbed with MH, PS-100 nm delayed the hatching at 16 h followed by intake, developmental deformity at the 1st instar stage and accumulation in the gut region.                                                                      |
|               |          |          |          | <b>PS-COOH-100+MH</b><br>Similar to PS-100 nm with a slightly reduced toxicity                                                                                                                                                                                 |
|               |          |          |          | <b>PS-NH<sub>2</sub>-100+MH</b><br>Highly significant among all others, where the cyst is observed to completely spherical showing delayed hatching. Delay in developmental growth as seen in 2 <sup>nd</sup> instar stages and 3 <sup>rd</sup> instar stages. |
|               |          |          |          | <b>PS-500 +MH</b><br>Accumulation of particles are visible.                                                                                                                                                                                                    |
|               |          |          |          | <b>PS-200 (FI)+MH</b><br>Accumulation of complex were observed in the gut region                                                                                                                                                                               |
|               |          |          |          | <b>MH</b><br>No toxic effects observed<br>But little accumulation                                                                                                                                                                                              |
|               |          |          |          | <b>CONTROL</b><br>No developmental abnormalities                                                                                                                                                                                                               |

**Fig. S3:** Developmental changes of *A. salina* on exposure to different NPs and MH complexes.

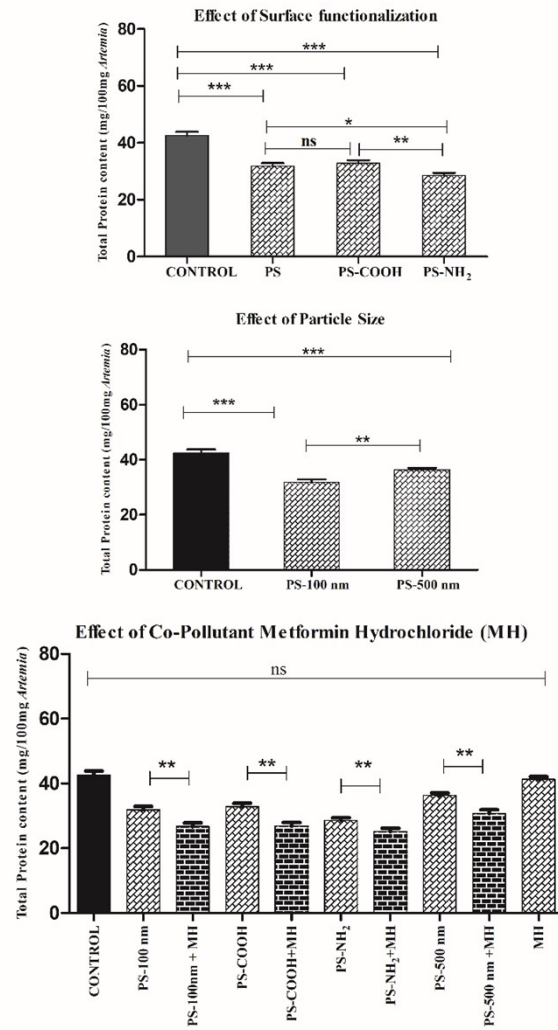

**Fig. S4:** Total protein content of *A. salina* on interaction with NPs and MH complexes (n=3). All values expressed as mean±SD. (\*\*\*)P<0.0001)
